# Supplementary material for: Use quantitative parameters in spectral computed tomography for the differential diagnosis of metastatic mediastinal lymph nodes in lung cancer patients
Source: PubMed Central journal article supplement — J Thorac Dis. 2021 Aug;13(8):4703–13. doi: 10.21037/jtd-21-385 (PMC8411177; doi:10.21037/jtd-21-385), 2021-08
Supplement: jtd-13-08-4703-supplementary.pdf [file jtd-13-08-4703-supplementary.pdf]

**Supplementary****Table S1** Morphological and pathological results of LNs

| Pathology                 | Short diameter of lymph node |            | Total       |
|---------------------------|------------------------------|------------|-------------|
|                           | ≥10 mm                       | <10 mm     |             |
| Metastatic LNs, n (%)     | 48 (64.9)                    | 26 (35.1)  | 74 (100.0)  |
| Non-metastatic LNs, n (%) | 24 (15.8)                    | 128 (84.2) | 152 (100.0) |
| Total                     | 72                           | 154        | 226         |

LNs, lymph nodes.
